# Supplementary material for: National Rapid Genome Sequencing in Neonatal Intensive Care
Source: PubMed Central journal article supplement — JAMA Netw Open. 2024 Feb 22;7(2):e240146. doi: 10.1001/jamanetworkopen.2024.0146 (PMC10884880; doi:10.1001/jamanetworkopen.2024.0146), 2024-02-22
Supplement: jamanetwopen-e240146-s003.pdf [file jamanetwopen-e240146-s003.pdf]

## Data Sharing Statement

Marom. National Rapid Genome Sequencing in Neonatal Intensive Care. *JAMA Netw Open*.  
Published February 22, 2024. doi:10.1001/jamanetworkopen.2024.0146

### Data

**Data available:** No

### Additional Information

**Explanation for why data not available:** The data is included in supplementary data of the manuscript
